# Supplementary material for: Restriction Enzyme Based Enriched L1Hs sequencing (REBELseq)
Source: bioRxiv or medRxiv preprint supplement (doi:10.1101/710095), 2019-08-27
Supplement: Supplementary file [file media-1.pdf]

## 1 **Supplemental Methods**

### 2 Brain Samples

3           177 fresh frozen human postmortem prefrontal cortex brain samples (Brodmann's Area  
4 9 or 10) were provided by the Douglas-Bell Canada Brain Bank at McGill University, the Human  
5 Brain and Spinal Fluid Resource Center at UCLA, the Sydney Brain Bank at Neuroscience  
6 Research Australia, or the University of Miami Brain Endowment Bank. All samples were from  
7 sudden death cases without prolonged agonal conditions. Causes of death involving neural  
8 trauma or asphyxiation and post-mortem intervals > 48 hours were excluded.

### 9 Purification of DNA from NeuN+ nuclei

10           Brain samples were processed and stained for NeuN by modification of a previously  
11 described method (1). Frozen brain samples (40-80 mg) were homogenized on wet ice using a  
12 Dounce homogenizer (Sigma #D8938-1SET) in 1 mL sucrose lysis buffer, containing 0.32 M  
13 sucrose, 5 mM CaCl<sub>2</sub>, 3 mM MgOAc<sub>2</sub>, 0.1 mM EDTA, 10 mM Tris, 1 mM DTT, 1 mM PMSF, 15  
14 μL protease inhibitor cocktail (Sigma #P8340), 5 μL RNaseOUT (Invitrogen #10777019) and 1  
15 μL Triton X-100, using 25 strokes with the large clearance pestle and 25 strokes with the small  
16 clearance pestle. 500 μL aliquots of homogenate were layered on top of 200 μL of sucrose  
17 cushion solution, containing 1.8 M sucrose, 3 mM MgOAc<sub>2</sub>, 10 mM Tris, 1 mM DTT, 1 mM  
18 PMSF, 2 μL protease inhibitor cocktail and 2.5 μL RNaseOUT, in a 1.5 mL Eppendorf style tube  
19 and centrifuged at 21 130 x g for 30 minutes (min) at 4 °C to pellet nuclei. The middle protein  
20 layer and upper liquid phase, containing total cytosolic RNA, were removed, diluted in 4 mL of  
21 TRIzol solution (Invitrogen #15596-018) and frozen at -80 °C for future analysis. The remaining  
22 sucrose cushion solution was removed and discarded, taking care not to disturb the nuclei  
23 pellet. 65 μL of PBS + 3 mM MgCl<sub>2</sub> was added to each nuclei pellet and incubated on wet ice for  
24 15 min, to allow the pellet to soften. Following incubation, pellets were further loosened by  
25 gentle up and down pipetting. The solutions containing each pair of pellets, from the previously  
26 separated homogenate, were transferred to a 2 mL Eppendorf style tube for nuclei staining, with

27 55  $\mu$ L PBS + 3 mM  $MgCl_2$ , 25  $\mu$ L BSA blocking solution, containing 0.5% BSA and 10% normal  
28 goat serum, 10  $\mu$ L 7.5  $\mu$ M DAPI and 30  $\mu$ L 1:10 diluted  $\alpha$ -NeuN-AF488 antibody (Millipore  
29 #MAB377X). Nuclei staining reactions were incubated on a nutator, protected from light, at 4  $^{\circ}C$   
30 for 60 min. Staining solutions were loaded onto Falcon tubes with 30  $\mu$ m cell strainer caps  
31 (Fisher #08-771-23) and filtered by gravity flow.

32 Labeled nuclei were sorted into NeuN+ and NeuN- fractions in 15 mL conical vials  
33 containing 500  $\mu$ L of PBS + 3 mM  $MgCl_2$  cushion using a FACSAria II (Beckman-Coulter; See  
34 Supplemental Methods Figure 1 for example FACS separation image). After sorting, NeuN+ and  
35 NeuN- nuclei fractions were diluted to 2 mL final volume using PBS + 3 mM  $MgCl_2$ . 400  $\mu$ L (0.2  
36 volumes) of sucrose cushion solution, described above, was added to each tube, mixed by  
37 gentle inversions and allowed to incubate, on ice, for 15 min. Diluted nuclei fractions were  
38 centrifuged at 2,000 x g for 30 min at 4  $^{\circ}C$  to pellet nuclei, after which, all but 100  $\mu$ L of  
39 supernatant was removed by careful pipetting. 600  $\mu$ L digestion buffer, containing 50 mM Tris,  
40 100 mM EDTA, 100 mM NaCl and 1% SDS, and 35  $\mu$ L proteinase K solution (Sigma  
41 #3115828001) was added, mixed by vortexing and allowed to incubate, overnight, in a 56  $^{\circ}C$   
42 water bath. The following morning, NeuN+ and NeuN- genomic DNA (gDNA) were isolated  
43 using the Zymo Research genomic DNA clean and concentrator kit (#D4011), utilizing the  
44 manufacturer's protocol, and the concentration was determined using a Qubit 3 fluorometer and  
45 high-sensitivity double-stranded DNA assay (ThermoFisher #Q32854).

46

#### 47 Construction of Ta subfamily enriched L1Hs amplified sequencing libraries

48 33 ng (~5000 diploid genomes) of NeuN+ gDNA for each sample was digested with 5 U  
49 HaeIII (New England Biolabs #R0108M) in a 10  $\mu$ L reaction, containing 1X CutSmart buffer  
50 (New England Biolabs #B7204S) and 1 U recombinant shrimp alkaline phosphatase (New  
51 England Biolabs #M0371S) according to the manufacturer's protocol (HaeIII digestion, Fig. 1).  
52 Samples were incubated at 37  $^{\circ}C$  60:00 min, then 80  $^{\circ}C$  20:00 min, then 4  $^{\circ}C$  hold. All the

53 digested NeuN+ gDNA was then used as a template for a 25  $\mu$ L single cycle primer extension  
54 reaction (Single Primer Extension, Fig. 1), containing 1X GoTaq HotStart Colorless Master Mix  
55 (Promega #M5133) and 33.2 fmol/ $\mu$ L L1HsACA primer (See Supplemental Oligomers), which  
56 should extend only Ta subfamily L1 3' UTR sequence (2) and the adjacent downstream  
57 genomic DNA. Samples were incubated at 95  $^{\circ}$ C 2:30 min, then 95  $^{\circ}$ C 0:30 min, 60  $^{\circ}$ C 1:00  
58 min, 72  $^{\circ}$ C 1:00 min, then 4  $^{\circ}$ C hold. All of the L1HsACA primed, 3' A-overhang extension  
59 products were ligated to a double stranded T-linker molecule (See Supplemental Oligomers),  
60 with a 5' phosphate on the top strand, in a 30  $\mu$ L reaction (T-linker ligation, Fig. 1), containing  
61 1X T4 DNA Ligase Buffer (New England Biolabs #B0202S), 400 U T4 DNA Ligase (New  
62 England Biolabs #M0202L) and 2.78 pmol/ $\mu$ L double stranded T-linker. Samples were  
63 incubated at 16  $^{\circ}$ C for 120 min, then 65  $^{\circ}$ C 20 min, then 4  $^{\circ}$ C hold. All of the T-linker ligated, Ta  
64 subfamily L1 elements were amplified (Primary PCR, Fig. 1) to enrich the number of copies of  
65 each unique Ta subfamily L1 in a 50  $\mu$ L reaction, containing 1X GoTaq HotStart Colorless  
66 Master Mix, 0.2 pmol/ $\mu$ L L1HsACA primer and 0.2 pmol/ $\mu$ L T-linker bottom strand primer (See  
67 Supplemental Oligomers). Primary PCR was thermal cycled as 95  $^{\circ}$ C 2:30 min, then 20 cycles  
68 of 95  $^{\circ}$ C 0:30 min, 60  $^{\circ}$ C 0:30 min, 72  $^{\circ}$ C 1:30 min, then 72  $^{\circ}$ C 5:00 min, 4  $^{\circ}$ C hold. The primary  
69 PCR product was then diluted 1:10 in nuclease free water and used as template in a 25  $\mu$ L  
70 hemi-nested PCR reaction (Secondary PCR, Fig. 1), containing 2.5  $\mu$ L 1:10 diluted Primary  
71 PCR, 1X GoTaq HotStart Colorless Master Mix, 0.2 pmol/ $\mu$ L T-linker bottom strand primer and  
72 0.2 pmol/ $\mu$ L Seq2-L1HsG primer (See Supplemental Oligomers). Secondary PCR was thermally  
73 cycled as 95  $^{\circ}$ C 2:30 min, then 35 cycles of 95  $^{\circ}$ C 0:30 min, 60  $^{\circ}$ C 0:30 min, 72  $^{\circ}$ C 1:30 min,  
74 then 72  $^{\circ}$ C 5:00 min, 4  $^{\circ}$ C hold. The secondary PCR product was cleaned and size selected  
75 using KAPA Pure Beads (Roche #KK8002) according to the manufacturer's protocol for a  
76 0.55X-0.75X double-sided size selection, generating a 12  $\mu$ L eluate of purified library of 200-  
77 1,000 bp fragments. The purified secondary PCR library was then used as a template for the  
78 addition of one of six single indexed Illumina flow cell adapters in a 50  $\mu$ L reaction (Tertiary

79 PCR, Fig. 1) , containing 11  $\mu$ L purified secondary PCR library, 1X Phusion HF Polymerase  
80 Buffer (New England Biolabs #B0518S), 2.5 U Phusion Hot Start HF polymerase (New England  
81 Biolabs #M0535L), 0.2 mM dNTPs (Thermo #R0191), 0.5  $\mu$ mol/ $\mu$ L Adapt2-Seq1 primer and 0.5  
82  $\mu$ mol/ $\mu$ L Adapt1-Barcode-Seq2 primer (See Supplemental Oligomers). Tertiary PCR was  
83 thermally cycled as 98 °C 0:30 min, then 15 cycles of 98 °C 0:05 min, 72 °C 0:15 min, then 72  
84 °C 1:00 min, 4 °C hold. Finally, the tertiary PCR reactions underwent final cleanup and size  
85 selection by KAPA Pure Beads 0.55X-0.75X double-sided size selection, with a final eluant  
86 volume of 22  $\mu$ L. This purification was verified, and the average fragment size of the library was  
87 determined, using the 2100 Bioanalyzer and high sensitivity DNA kit (Agilent #5067-4626; see  
88 Supplemental Methods Figure 2 for example bioanalyzer trace).

89

#### 90 Library quantification, pooling and sequencing

91 The barcoded, L1-enriched sequencing libraries were quantified, in triplicate, for the  
92 concentration of PCR fragments properly flanked by the Illumina flow cell adapters using the  
93 KAPA Library Quantification Kit (Roche #KK4835) and 7900HT real-time PCR (Applied  
94 Biosystems) according to the manufacturer's protocol, utilizing 1:20,000, 1:200,000 and  
95 1:2,000,000 dilutions. Using the KAPA Library Quantification Analysis Template\_ILM\_v4-1, the  
96 Ct values and the average fragment size (determined above by Bioanalyzer), the concentration  
97 of sequenceable library was calculated for each sample. Samples were pooled in groups of six,  
98 each having a unique barcode from the Adapt1-Barcode-Seq2 primer (described above), in 30  
99  $\mu$ L pools of 25 nM equimolar final concentration. Pooled libraries were then sequenced by the  
100 University of Pennsylvania Next-Generation Sequencing Core, using one pool per lane, on an  
101 Illumina HiSeq 4000 utilizing 150 bp paired-end sequencing and 10% PhiX sequencing control  
102 spike-in (Illumina #FC-110-3001). Raw sequencing data was evaluated by Illumina quality filters  
103 and reads passing filter were deconvoluted by sequencing lane and barcode and transferred  
104 into read 1 and read 2 (paired end) FASTQ files.

105 Bioinformatics

106 Demultiplexed FASTQ files from sequencing were transferred to the Penn Medicine  
107 Academic Computing Services servers for analysis. Initial evaluation of sequencing read quality  
108 showed high quality reads for read 1 and diminished quality for read 2 (paired end reads), likely  
109 due to the need to sequence through the low diversity L1HsG primer and the low complexity,  
110 highly repetitive, variable length poly(A) tail of L1Hs elements. Therefore, only read 1 sequence  
111 data was used for all subsequent bioinformatics. PhiX spike-in sequences were removed from  
112 an individual's FASTQ file using BBTools (<https://sourceforge.net/projects/bbmap>) bbdduk  
113 (BBTools decontamination using k-mers) and the PhiX sequence as reference. Remaining  
114 reads were end trimmed of Illumina flow cell and sequencing adapters and cleaned based on a  
115 Phred quality score of  $Q \geq 20$  using bbdduk. Trimmed reads were aligned to the hg19 build of the  
116 human genome with Bowtie2-2.1.0 (3) using the end-to-end, very sensitive alignment  
117 parameters, to generate a sequence alignment map (SAM) file for each individual. Investigation  
118 into the unaligned reads showed that ~10% contained a poly(T) stretch after the genomic  
119 portion of the read that was unalignable, possibly corresponding to the poly(A) sequence at the  
120 3' end of non-reference L1Hs elements. As such, bbdduk was used to k-trim poly(T) stretches  
121 from the 3' end of the unaligned reads using a k-mer of 11 T's and a hamming distance of 1.  
122 The poly(T) trimmed reads were realigned to hg19 with Bowtie2-2.1.0 using end-to-end, very  
123 sensitive alignment parameters, generating a second SAM alignment file for each individual.  
124 Each SAM file was converted to a binary alignment map (BAM) format, during which alignments  
125 with a MapQ score  $< 30$  were removed using samtools-0.1.19 (4). The two BAM files for each  
126 individual, one from each alignment, were merged, sorted and indexed using samtools-0.1.19.  
127 Using samtools-0.1.19, BAM files from all individuals were merged into a single BAM file using  
128 RG tags (-r option) and this combined BAM file was sorted and indexed. The single merged  
129 BAM file with RG tags was split into BAM files containing the data for each chromosome using  
130 samtools-0.1.19, and the chromosome specific BAM files were used as input for the custom

131 python script REBELseq\_v1.0. REBELseq\_v1.0 utilizes the sorted and indexed reads in the  
132 chromosome specific BAM files to generate peaks of overlapping reads within a 150 base pair  
133 sliding window, and does so with respect to DNA strand. Each peak corresponds to a putative  
134 L1 retrotransposon insertion, for which the peak's genomic coordinates, number of unique reads  
135 per peak, number of reads per individual sample and average read alignment quality (mean  
136 MapQ) are determined. The REBELseq\_v1.0 output file was then further annotated using the  
137 custom python script REBELannotate\_v1.0 for L1Hs annotated in hg19 repeat masker and  
138 L1Hs identified in the 1000 genomes data. REBELannotate\_v1.0 utilizes a browser extensible  
139 data (BED) formatted file to annotate genomic features of interest that overlap with or occur  
140 within 500 base pairs downstream, with respect to strand, of the peak being annotated. All  
141 REBELseq\_v1.0 peaks that were annotated by REBELannotate\_v1.0 as an L1Hs in hg19  
142 repeat masker are referred to throughout the manuscript as reference L1Hs. All peaks that did  
143 not annotate to an hg19 repeat masker L1Hs are collectively referred to as non-reference L1Hs.  
144 Non-reference L1Hs that annotate to the 1000 genomes data are referred to as known non-  
145 reference L1Hs and non-reference L1Hs that did not annotate to the 1000 genomes data are  
146 putatively referred to as novel non-reference L1Hs. The novel non-reference L1Hs include what  
147 are likely real L1Hs insertions (because they meet our cutoff criteria) that inserted into older  
148 repetitive elements (Alu, L1Pa, etc.) within the reference genome. The REBELseq\_v1.0 and  
149 REBELannotate\_v1.0 custom scripts are based on work originally described by Ewing and  
150 Kazazian (5).

151         Scrutiny of the output data from REBELseq showed a low level of index hopping  
152 between multiplexed samples. Index hopping was remediated by removing samples with less  
153 than 6% (6) of the maximum read count per set of six multiplexed samples for a given L1  
154 insertion. It is notable that index hopping could be eliminated by utilizing a second unique bar  
155 code in tertiary PCR (i.e. unique dual-indexing), thereby causing index hopped reads to be  
156 discarded during demultiplexing (7).

- 157 1. Jiang Y, Matevossian A, Huang HS, Straubhaar J, Akbarian S. Isolation of neuronal  
158 chromatin from brain tissue. *BMC Neurosci.* 2008;9:42.
- 159 2. Boissinot S, Chevret P, Furano AV. L1 (LINE-1) retrotransposon evolution and  
160 amplification in recent human history. *Molecular biology and evolution.* 2000;17(6):915-28.
- 161 3. Langmead B, Salzberg SL. Fast gapped-read alignment with Bowtie 2. *Nat Methods.*  
162 2012;9(4):357-9.
- 163 4. Li H, Handsaker B, Wysoker A, Fennell T, Ruan J, Homer N, et al. The Sequence  
164 Alignment/Map format and SAMtools. *Bioinformatics.* 2009;25(16):2078-9.
- 165 5. Ewing AD, Kazazian HH, Jr. Whole-genome resequencing allows detection of many rare  
166 LINE-1 insertion alleles in humans. *Genome research.* 2011;21(6):985-90.
- 167 6. Costello M, Fleharty M, Abreu J, Farjoun Y, Ferriera S, Holmes L, et al. Characterization  
168 and remediation of sample index swaps by non-redundant dual indexing on massively parallel  
169 sequencing platforms. *BMC Genomics.* 2018;19(1):332.
- 170 7. MacConaill LE, Burns RT, Nag A, Coleman HA, Slevin MK, Giorda K, et al. Unique,  
171 dual-indexed sequencing adapters with UMIs effectively eliminate index cross-talk and  
172 significantly improve sensitivity of massively parallel sequencing. *BMC Genomics.*  
173 2018;19(1):30.

174

175

176

177

178

179

180

181

182

183

184

185

186

187

188

189

190

191 **Supplemental Methods Figures**192 **Supplemental Methods Figure 1**

193 FACS of NeuN stained nuclei. Representative image showing FACS separation of NeuN+ and  
194 NeuN- DAPI stained nuclei. Boxes indicate gating for populations of nuclei that were collecting  
195 for gDNA isolation.

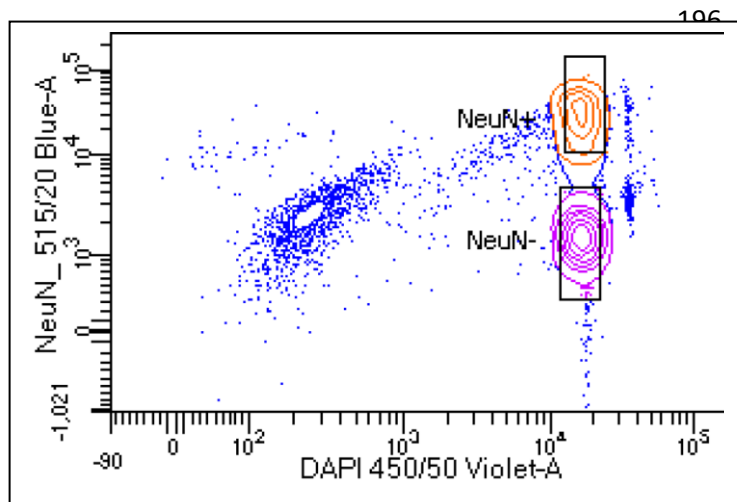

204

205

206

207

208

209

210

211

212

213

214

215

216



217 Supplemental Methods Figure 2

218 Confirmation of amplicon size selection. Representative bioanalyzer trace showing the size  
219 distribution of the size selected final, Ta subfamily-enriched L1Hs-amplified sequencing library  
220 for an individual sample. Size selected amplicon products were distributed between 200-1000  
221 base pairs (bp, x-axis). Y-axis is arbitrary florescent units (FU).

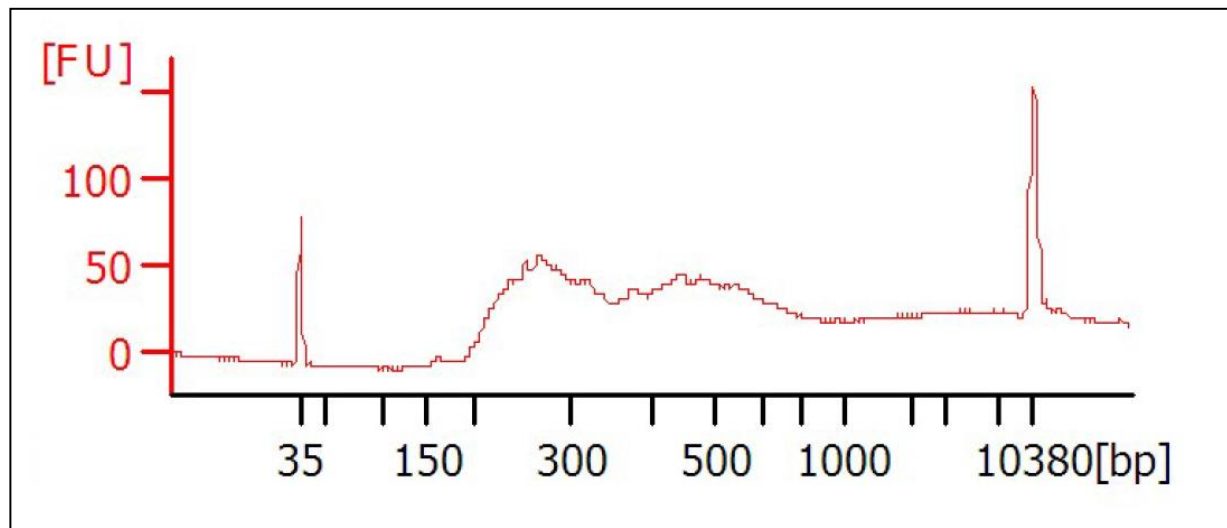

222

223

224

225

226

227

228

229

230

231

232

233

234

235

236

237

238

239

240

241

242

243

244

245

246 **Supplemental Oligomers**

247

248 **L1HsACA primer**

249 GGGAGATATACCTAATGCTAGATGACACA

250

251 **Double stranded T-Linker**

252 AGATGTGAGAAAGGGATGTGCTGCGAGAAGGCTAG/Phos/5'

253 TCTACACTCTTTCCCTACACGACGCTCTTCCGATC\*T

254

255 **T-linker bottom strand primer**

256 TCTACACTCTTTCCCTACACGACGCTCTTCCGATCT

257

258 **Seq2-L1HsG primer**

259 GTGACTGGAGTTCAGACGTGTGCTCTTCCGATCTGCACATGTACCCTAAAACCTTAG

260

261 **Adapt2-Seq1**

262 AATGATACGGCGACCACCGAGATCTACACTCTTTCCCTACACGACGCTCTTCCGATCT

263

264 **Adapt1-Barcode-Seq2 - Index 1**

265 CAAGCAGAAGACGGCATAACGAGATACATCGGTGACTGGAGTTCAGACGTGTGCTCTTCCGATC\*T

266

267 **Adapt1-Barcode-Seq2 - Index 2**

268 CAAGCAGAAGACGGCATAACGAGATGGGTCAAGTGACTGGAGTTCAGACGTGTGCTCTTCCGATC\*T

269

270 **Adapt1-Barcode-Seq2 - Index 3**

271 CAAGCAGAAGACGGCATAACGAGATCACTGTGTGACTGGAGTTCAGACGTGTGCTCTTCCGATC\*T

272

273 **Adapt1-Barcode-Seq2 - Index 4**

274 CAAGCAGAAGACGGCATAACGAGATATTGGCGTGACTGGAGTTCAGACGTGTGCTCTTCCGATC\*T

275

276 **Adapt1-Barcode-Seq2 - Index 5**

277 CAAGCAGAAGACGGCATAACGAGATGATCTGGTGACTGGAGTTCAGACGTGTGCTCTTCCGATC\*T

278

279 **Adapt1-Barcode-Seq2 - Index 6**

280 CAAGCAGAAGACGGCATAACGAGATTACAAGGTGACTGGAGTTCAGACGTGTGCTCTTCCGATC\*T

281

282

283 \* denotes a phosphorothioate bond and highlighting denotes barcode sequence

284

285

286

287

288

289

290

291

292

293

294
